# Supplementary material
Source: bioRxiv or medRxiv preprint supplement (https://www.biorxiv.org/highwire/filestream/49608/field_highwire_adjunct_files/0/163758-1.pdf)
Supplement: Supplementary file [file 163758-1.pdf]

# Supplementary Information

## Structural covariance networks are coupled to expression of genes enriched in supragranular layers of the human cortex

Rafael Romero-Garcia<sup>1,§</sup>, Kirstie J Whitaker<sup>1,2</sup>, František Váša<sup>1</sup>, Jakob Seidlitz<sup>1</sup>, Maxwell Shinn<sup>1</sup>, Peter Fonagy<sup>3</sup>, Raymond J Dolan<sup>4,5</sup>, Peter B Jones<sup>1,6</sup>, Ian M Goodyer<sup>1,6</sup>, the NSPN Consortium<sup>‡</sup>, Edward T Bullmore<sup>1,6,7</sup>, Petra E Vértes<sup>1</sup>.

<sup>1</sup>Department of Psychiatry, University of Cambridge, Cambridge, CB2 0SZ, UK.

<sup>2</sup>The Alan Turing Institute for Data Science, British Library, 96 Euston Road, London, NW1 2DB, United Kingdom

<sup>3</sup>Research Department of Clinical, Educational and Health Psychology, University College London, London, WC1E 6BT, UK.

<sup>4</sup>Wellcome Trust Centre for Neuroimaging, UCL Institute of Neurology, University College London, London, WC1N 3BG, UK.

<sup>5</sup>Max Planck UCL Centre for Computational Psychiatry and Ageing Research, London, WC1B 5EH, UK.

<sup>6</sup>Cambridgeshire and Peterborough NHS Foundation Trust, Huntingdon, PE29 3RJ, UK.

<sup>7</sup>ImmunoPsychiatry, Immuno-Inflammation Therapeutic Area Unit, GlaxoSmithKline R&D, Stevenage SG1 2NY, UK.

§ **Correspondence to:** Rafael Romero-Garcia PhD, University of Cambridge, Department of Psychiatry, Sir William Hardy Building, Downing Street, Cambridge CB2 3EB, UK Tel: 1223 764673, Email: rr480@cam.ac.uk

**Keywords:** Allen Brain Atlas, cortical thickness, gene expression, structural brain network, transcriptomic brain network

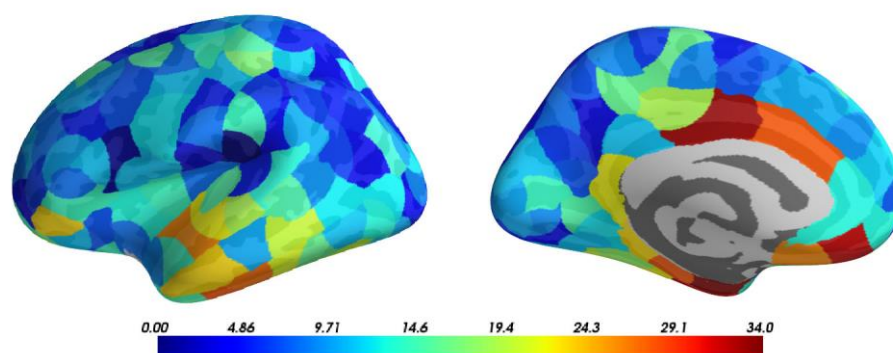

**Figure S1:** Number of AIBS samples in each cortical region.

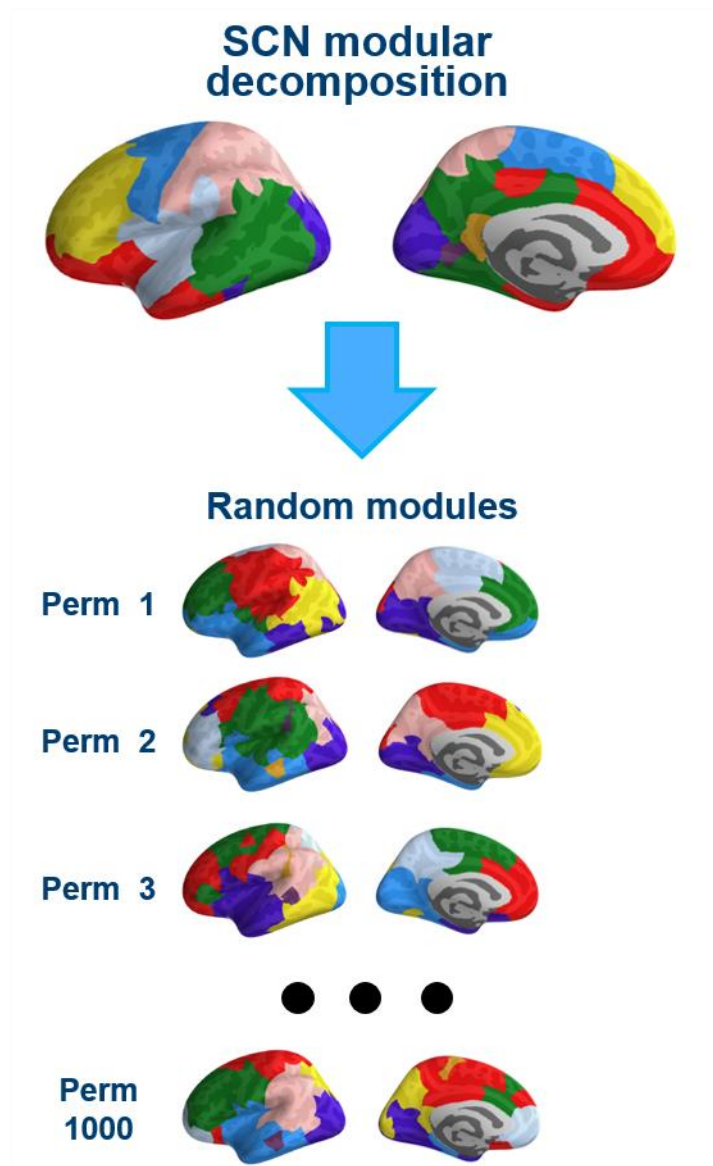

**Figure S2:** Random modular communities that preserve the number and size of modules, as well as the spatial contiguity of the empirical community partition.

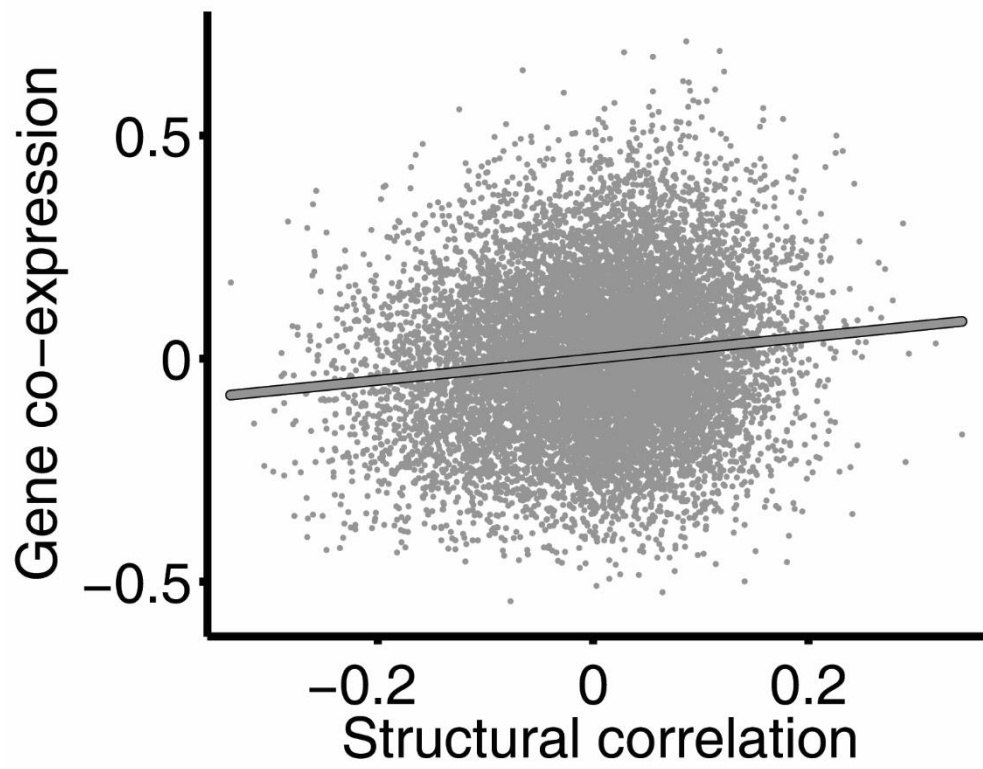

**Figure S3:** Scatterplot of gene co-expression versus structural covariance after regressing out the effect of the inter-regional distance.

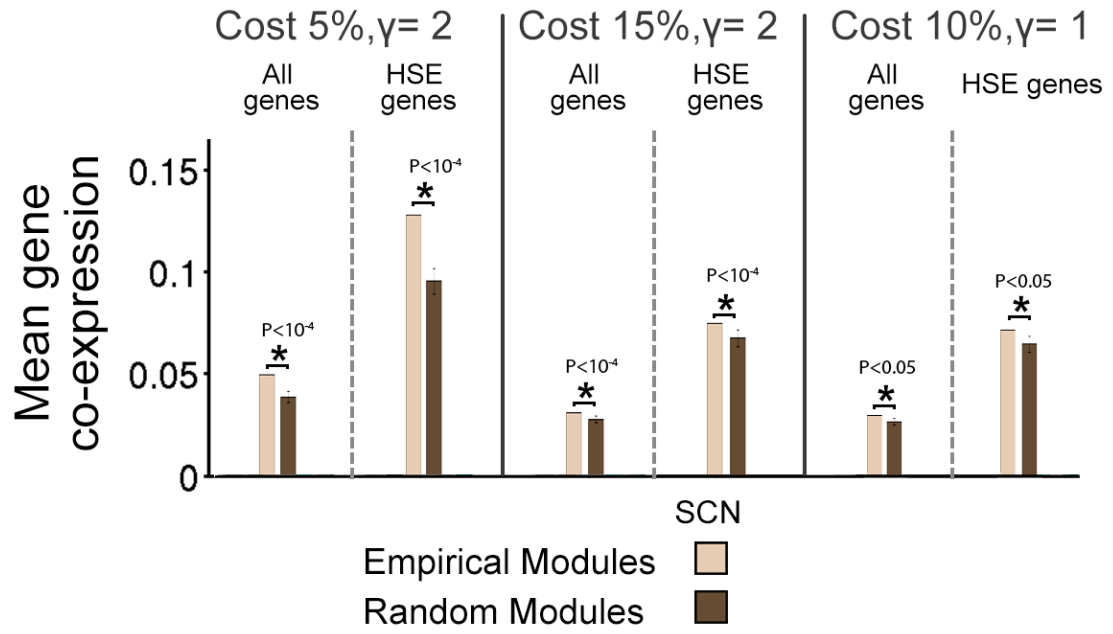

**Figure S4:** Mean gene co-expression between nodes located in the same SCN module for the empirical modules (light colors) and the random null modules (dark colors). Results replicated for different SCN costs (5%, 10% and 15%) and modularity resolution parameters ( $\gamma=1$  and  $\gamma=2$ ).

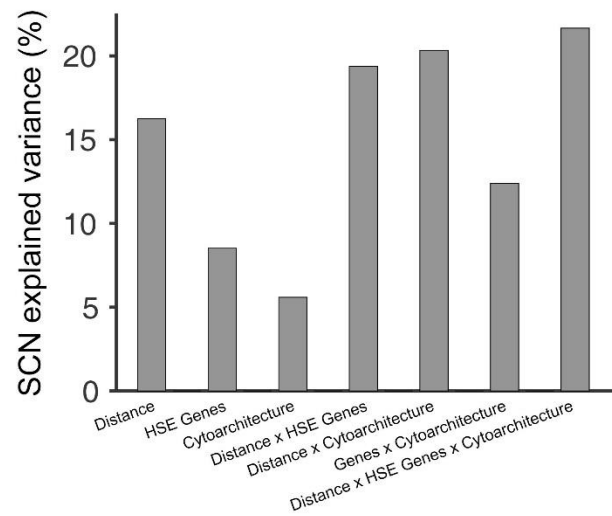

**Figure S5:** HSE gene expression has effects on structural covariation that are additive to the effects of connection distance. First column represents the SCN variance explained ( $R^2$ ) by inter-regional distance using the log value of the inter-regional distance. Second and third column show the SCN variance explained by HSE gene expression and VE. The rest of the columns display the SCN variance explained by a linear multiple regression using combinations of variables.

## **NSPN Consortium member list**

### **Chief investigator:**

Edward Bullmore

### **Principal investigators:**

Ian Goodyer  
Raymond Dolan  
Peter Fonagy  
Peter Jones

### **Associated faculty:**

Peter Dayan  
Paul Fletcher  
John Suckling  
Nikolaus Weiskopf  
Pasco Fearon

### **Project managers:**

Becky Inkster  
Gita Prabhu

### **Postdoctoral research associates and associated research fellows:**

Eran Eldar  
Tobias Hauser  
Konstantinos Ioannidis  
Gemma Lewis  
Alda Mita  
Michael Moutoussis  
Sharon Neufeld  
Ela Polek-MacDaeid  
Rafael Romero-Garcia  
Michelle St Clair  
Jan Stochl  
Roger Tait  
Beata Tick  
Umar Toseeb  
Anne-Laura van Harmelen  
Petra Vértés  
Kirstie Whitaker  
Geert-Jan Will  
Gabriel Ziegler  
Jorge Zimbron

### **PhD & MSc students:**

Joost Haarsma  
Sian Davies  
Juliet Griffin  
Michael Hart  
Jakob Seidlitz  
Maxwell Shinn  
František Váša  
Konrad Wagstyl

Data managers:  
Cinly Ooi  
Barry Widmer

**Research assistants:**

Ayesha Alrumaithi  
Sarah Birt  
Kalia Cleridou  
Hina Dadabhoy  
Ashlyn Firkins  
Sian Granville  
Elizabeth Harding  
Alexandra Hopkins  
Daniel Isaacs  
Janchai King  
Clare Knight  
Danae Kokorikou  
Christina Maurice  
Cleo McIntosh  
Jessica Memarzia  
Harriet Mills  
Ciara O'Donnell  
Sara Pantaleone  
Jennifer Scott  
Alison Stribling

**Administration team:**

Junaid Bhatti  
Neil Hubbard  
Natalia Ilicheva  
Michael Kentell  
Ben Wallis  
Laura Villis
